# Supplementary material for: Nrf2 Protects Against TWEAK-mediated Skeletal Muscle Wasting
Source: PubMed Central journal article supplement — Sci Rep. 2014 Jan 10;4:3625. doi: 10.1038/srep03625 (PMC3887379; doi:10.1038/srep03625), 2014-01-10
Supplement: srep03625-s1.pdf [file srep03625-s1.pdf]

## Supplementary information

# **NRF2 PROTECTS AGAINST TWEAK-MEDIATED SKELETAL MUSCLE WASTING**

Othman Al-Sawaf<sup>1\*</sup>, Athanassios Fragoulis<sup>1</sup>, Christian Rosen<sup>1</sup>, Yuet Wai Kan<sup>2</sup>, Tolga  
Taha Sönmez<sup>3</sup>, Thomas Pufe<sup>1</sup>, Christoph Jan Wruck<sup>1\*</sup>

- 1 Department of Anatomy and Cell Biology, University Hospital, RWTH Aachen University, Aachen, Germany
- 2 Department of Laboratory Medicine, University of California, San Francisco, California, USA.
- 3 Department of Oral and Maxillofacial Surgery, University Hospital, RWTH Aachen University, Aachen, Germany

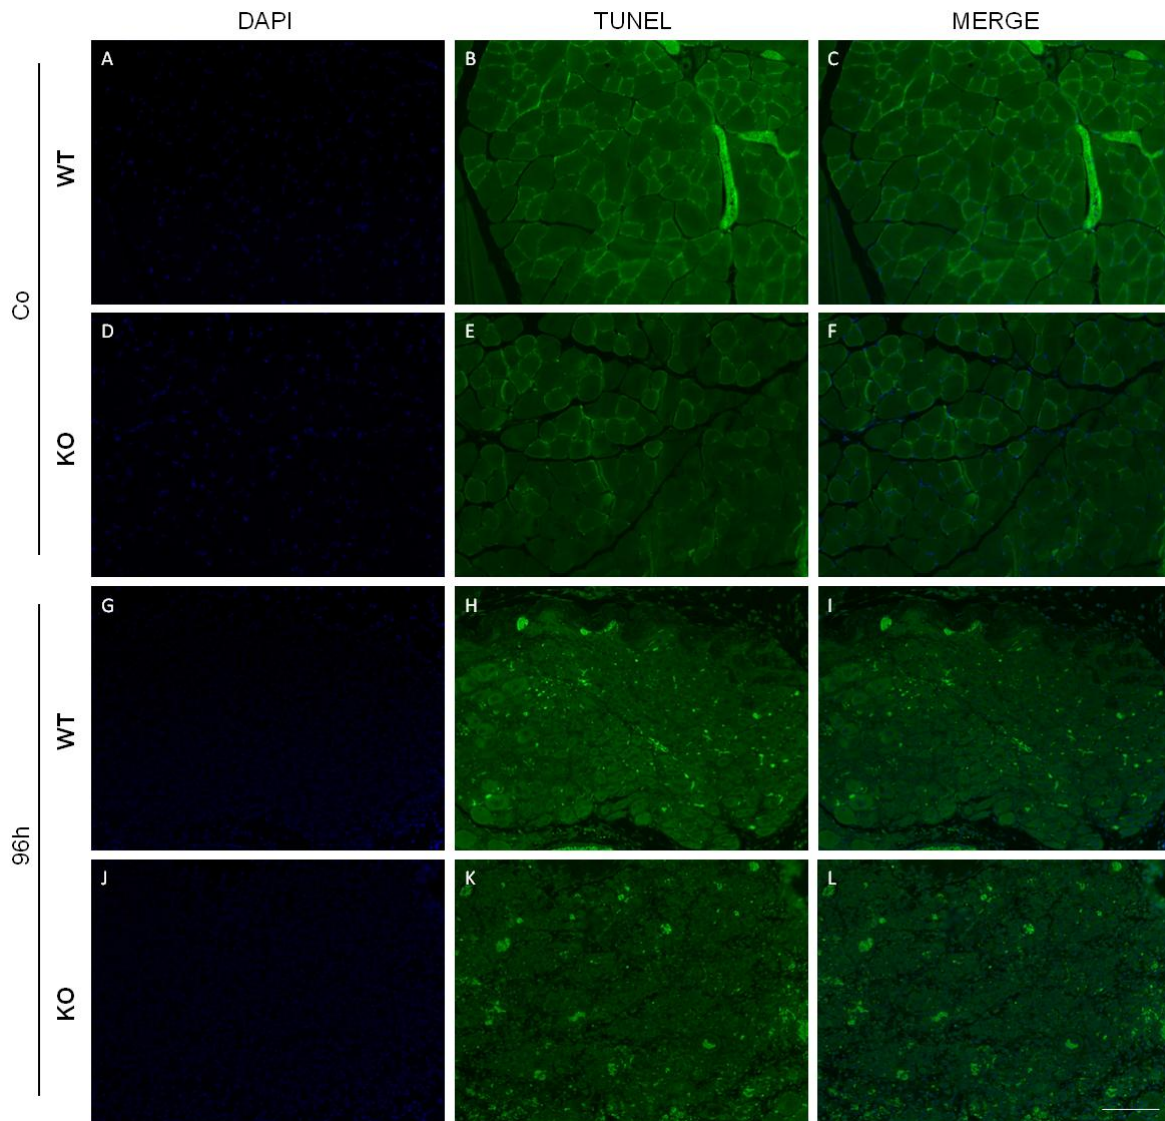

**Figure S1. Healthy and recovering Nrf2-WT and KO mice do not show apoptotic muscle cells.**

A TUNEL Assay was performed to detect apoptotic nuclei on sections of healthy (A-F) Nrf2-WT and KO mice and mice 96h after I/R injury (G-L). In contrast to mice 6h after injury (see Figure 2), no apoptosis can be detected under healthy conditions or during early regeneration 96h after ischemia.

Sections at x200 magnification. Scale bar represent 100 $\mu$ m. Experiments were performed with n=6.

**Nrf2 protects against TWEAK-mediated skeletal muscle wasting**  
*Al-Sawaf et al. (2013)*

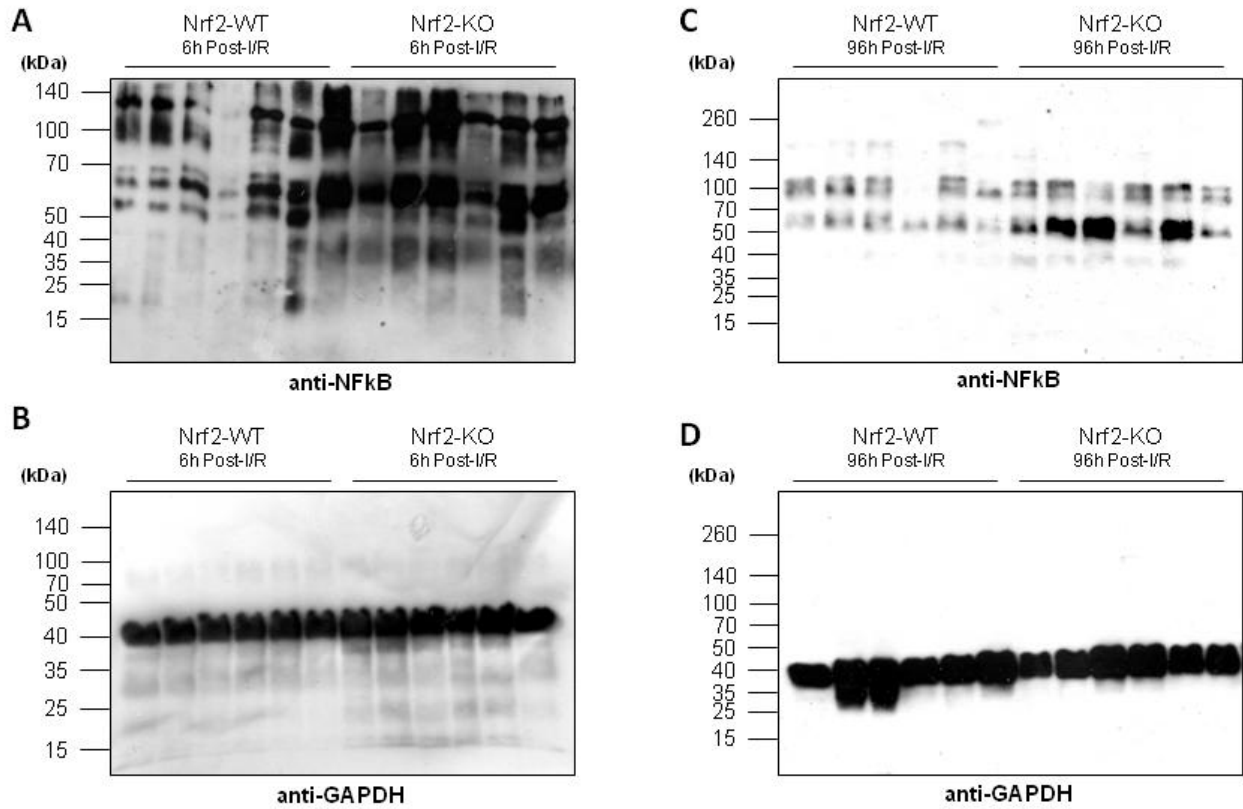

**Figure S2. Full-length blots.**

Regions of interest are highlighted in Figure 4E.

| Substance  | Target     | Applied concentration |
|------------|------------|-----------------------|
| SB 203580  | p38        | 5 $\mu$ M             |
| PD 98059   | ERK        | 20 $\mu$ M            |
| Wortmannin | PI3K       | 1 $\mu$ M             |
| SP 600125  | JNK        | 2 $\mu$ M             |
| Ro-31-8220 | GRK-5, PKC | 10 $\mu$ M            |

**Table S1. Kinase inhibitors used in this study.**

Substances were applied to C2C12 cells 30 minutes before TWEAK stimulation.
